# Supplementary material for: Assessing food insecurity and other barriers to adherence to a gluten-free diet among coeliac disease individuals in Pakistan
Source: Research Square preprint supplement (doi:10.21203/rs.3.rs-8559941/v1), 2026-01-22
Supplement: Supplementary file 1 [file 9c189cfe4ede7520d585c4f4.pdf]

## General questions

1. Do you have Coeliac disease?
  - No
  - Yes, I have coeliac disease myself
2. Do you follow a certain diet?
  - No
  - Yes, gluten free
  - Yes, carbohydrate-free/low-carb
  - Yes, lactose-free/low-lactose
  - Yes, the FODMAP diet
  - Other, namely.....
3. What is your gender
  - Male
  - Female
  - Other
4. What is your age?  
..... years
5. What is your height?  
..... centimetres
6. What is your weight?  
..... kilograms
7. In which province of Pakistan do you live?  
.....
8. What is your marital status?
  - Married
  - Single
9. How many people does your household consist of?

.....

10. What is your net monthly income (PKR) ?

- 50000
- 50000-100000
- 100000

11. What is the highest level of education you have completed?

- Matric
- FSC
- BSc and above

12. Do you have paid work or business?

- Yes
- No

### Specific questions about gluten-free products

The following questions are specifically about gluten-free eating and cooking. Please indicate to what extent you disagree or agree with the following statements:

|                                                                                                                                                       | Totally disagree | Disagree | Do not agree, do not disagree | Agree | Totally agree |
|-------------------------------------------------------------------------------------------------------------------------------------------------------|------------------|----------|-------------------------------|-------|---------------|
| 1. I find it difficult to eat gluten-free under normal circumstances                                                                                  | 1                | 2        | 3                             | 4     | 5             |
| 2. I find it difficult to cook gluten-free under normal circumstances                                                                                 | 1                | 2        | 3                             | 4     | 5             |
| 3. I find it difficult to eat gluten-free when I have little money                                                                                    | 1                | 2        | 3                             | 4     | 5             |
| 4. I find it difficult to cook gluten-free when I have little money                                                                                   | 1                | 2        | 3                             | 4     | 5             |
| 5. I find it difficult to eat gluten-free when I have little time                                                                                     | 1                | 2        | 3                             | 4     | 5             |
| 6. I find it difficult to cook gluten-free when I have little time                                                                                    | 1                | 2        | 3                             | 4     | 5             |
| 7. I find it difficult to eat a healthy gluten-free diet                                                                                              | 1                | 2        | 3                             | 4     | 5             |
| 8. I find it difficult to cook healthy gluten-free meals                                                                                              | 1                | 2        | 3                             | 4     | 5             |
| 9. I find it difficult to eat a varied gluten-free diet                                                                                               | 1                | 2        | 3                             | 4     | 5             |
| 10. I find it difficult to cook varied gluten-free meals                                                                                              | 1                | 2        | 3                             | 4     | 5             |
| 11. I find it difficult to eat a delicious gluten-free diet                                                                                           | 1                | 2        | 3                             | 4     | 5             |
| 12. I find it difficult to cook delicious gluten-free meals                                                                                           | 1                | 2        | 3                             | 4     | 5             |
| 13. I find it difficult to eat gluten-free with products that are naturally gluten-free (for example without gluten-free pasta or gluten-free bread)  | 1                | 2        | 3                             | 4     | 5             |
| 14. I find it difficult to cook gluten-free with products that are naturally gluten-free (for example without gluten-free pasta or gluten-free bread) | 1                | 2        | 3                             | 4     | 5             |
| 15. I find it difficult to eat gluten-free with the current range of gluten-free products in the supermarket                                          | 1                | 2        | 3                             | 4     | 5             |
| 16. I find it difficult to cook gluten-free with the current range of gluten-free products in the supermarket                                         | 1                | 2        | 3                             | 4     | 5             |
| 17. I find it difficult to eat gluten-free with the current range of gluten-free products in restaurants/cafes                                        | 1                | 2        | 3                             | 4     | 5             |
| 18. I find it difficult to eat gluten-free when I eat with friends/family/acquaintances                                                               | 1                | 2        | 3                             | 4     | 5             |
| 19. I find it difficult to eat gluten-free when the places that sell gluten-free products are far away                                                | 1                | 2        | 3                             | 4     | 5             |

## Food security

The following statements are about the food intake in your household and whether you could afford the (gluten-free) food you needed. The statements are about the past 12 months

Please indicate how often the statements below apply to you.

1. In the past 12 months, the food I (or other family members) bought was not enough, and I (or other family members) did not have money to buy more (gluten-free) food.
  - this happened often
  - this happened sometimes
  - this never happened
  - I don't know / I don't want to say
2. In the past 12 months, I (or other family members) did not have enough money to eat a healthy (gluten-free) meal.
  - this happened often
  - this happened sometimes
  - this never happened
  - I don't know / I don't want to say
3. In the past 12 months, I (or other family members) have sometimes cut the size of a meal or skipped a meal because there was not enough money for (gluten-free) food.
  - Yes
  - no (→continue to question 4)
  - I don't know / I don't want to say (→continue to question 4)
4. How often did this happen in the past 12 months?
  - (almost) every month
  - some months but not every month Only 1 or 2 months
  - I don't know / I don't want to say
5. In the past 12 months, I (or other family members) have sometimes eaten too little because there was not enough money for (gluten-free) food.
  - Yes
  - No
  - I don't know / I don't want to say
6. In the past 12 months, I (or other family members) have sometimes felt hungry, but didn't eat because there wasn't enough money for food.

- Yes
- No
- I don't know / I don't want to say

### Your opinion on financial matters

The following statements are about financial matters. The statements are about the past 12 months. To what extent do you agree or disagree with the following statements?

|    |                                                                          | Totally disagree | Disagree | Do not agree, do not disagree | Agree | Totally agree |
|----|--------------------------------------------------------------------------|------------------|----------|-------------------------------|-------|---------------|
| 1. | I often have too little money.                                           | 1                | 2        | 3                             | 4     | 5             |
| 2. | I wonder all the time if I have enough money.                            | 1                | 2        | 3                             | 4     | 5             |
| 3. | I often worry about money.                                               | 1                | 2        | 3                             | 4     | 5             |
| 4. | I'm only concerned with what I have to pay now. I'll see the rest later. | 1                | 2        | 3                             | 4     | 5             |
| 5. | I feel like I have little control over my financial situation.           | 1                | 2        | 3                             | 4     | 5             |

### WHO-5: a short self-reported measure of current mental well-being

The following questions are about your health and how you feel:

| Please indicate for each of the five statements which is closest to how you have been feeling over the past two weeks. Notice that higher numbers mean greater well-being. |                                                            | All of the time            | Most of the time           | More than half of the time | Less than half of the time | Some of the time           | At no time                 |
|----------------------------------------------------------------------------------------------------------------------------------------------------------------------------|------------------------------------------------------------|----------------------------|----------------------------|----------------------------|----------------------------|----------------------------|----------------------------|
| 1                                                                                                                                                                          | I have felt cheerful and in good spirits                   | 5 <input type="checkbox"/> | 4 <input type="checkbox"/> | 3 <input type="checkbox"/> | 2 <input type="checkbox"/> | 1 <input type="checkbox"/> | 0 <input type="checkbox"/> |
| 2                                                                                                                                                                          | I have felt calm and relaxed                               | 5 <input type="checkbox"/> | 4 <input type="checkbox"/> | 3 <input type="checkbox"/> | 2 <input type="checkbox"/> | 1 <input type="checkbox"/> | 0 <input type="checkbox"/> |
| 3                                                                                                                                                                          | I have felt active and vigorous                            | 5 <input type="checkbox"/> | 4 <input type="checkbox"/> | 3 <input type="checkbox"/> | 2 <input type="checkbox"/> | 1 <input type="checkbox"/> | 0 <input type="checkbox"/> |
| 4                                                                                                                                                                          | I woke up feeling fresh and rested                         | 5 <input type="checkbox"/> | 4 <input type="checkbox"/> | 3 <input type="checkbox"/> | 2 <input type="checkbox"/> | 1 <input type="checkbox"/> | 0 <input type="checkbox"/> |
| 5                                                                                                                                                                          | My daily life has been filled with things that interest me | 5 <input type="checkbox"/> | 4 <input type="checkbox"/> | 3 <input type="checkbox"/> | 2 <input type="checkbox"/> | 1 <input type="checkbox"/> | 0 <input type="checkbox"/> |

## Questionnaire in Urdu

۱۔ کیا آپ کو سیلیک بیماری ہے

الف۔ نہیں

ب۔ جی ہاں، مجھے خود سیلیک بیماری ہے

۲۔ کیا آپ کوئی مخصوص غذا استعمال کرتے ہیں؟

الف۔ نہیں

ب۔ جی ہاں، گلوٹن فری غذا

ج۔ جی ہاں، کم کاربوہائیڈریٹ / بغیر کاربوہائیڈریٹ والی غذا

د۔ جی ہاں، کم لیکٹوز / بغیر لیکٹوز والی غذا

غذا (FODMAP) ہ۔ جی ہاں، فوڈ میپ

و۔ دیگر، وضاحت کریں: \_\_\_\_\_

۳۔ آپ کی جنس کیا ہے؟

الف۔ مرد

ب۔ عورت

ج۔ دیگر

۴۔ آپ کی عمر کتنی ہے؟

سال \_\_\_\_\_

۵۔ آپ کا قد کتنا ہے؟

سینٹی میٹر \_\_\_\_\_

۶۔ آپ کا وزن کتنا ہے؟

کلو گرام \_\_\_\_\_

- آپ پاکستان کے کس صوبے میں رہتے ہیں؟ ۷

---

- آپ کی ازدواجی حیثیت کیا ہے؟ ۸

الف۔ شادی شدہ

ب۔ غیر شادی شدہ

- آپ کے گھرانے میں کتنے افراد رہتے ہیں؟ ۹

---

کیا ہے؟ (PKR)۔ آپ کی خالص ماہانہ آمدنی ۱۰

الف۔ ۵۰,۰۰۰ روپے سے کم

ب۔ ۵۰,۰۰۰ تا ۱۰۰,۰۰۰ روپے

ج۔ ۱۰۰,۰۰۰ روپے سے زیادہ

- آپ نے تعلیم کی سب سے اونچی سطح کون سی مکمل کی ہے؟ ۱۱

الف۔ میٹرک

ب۔ ایف۔ ایس۔ سی

ج۔ بی۔ ایس۔ سی یا اس سے زیادہ

- کیا آپ کوئی ملازمت یا کاروبار کرتے ہیں؟ ۱۲

الف۔ جی ہاں

ب۔ نہیں

گلوٹین سے پاک مصنوعات کے بارے میں مخصوص سوالات

مندرجہ ذیل سوالات خاص طور پر گلوٹین سے پاک کھانے اور کھانا پکانے کے بارے میں ہیں۔ براہ مہربانی اشارہ کریں کہ آپ مندرجہ ذیل بیانات سے کس حد تک متفق یا متفق ہیں:

| مکمل طور پر متفق ہوں | اتفاق کرنا | اختلاف نہ کریں، اختلاف نہ کریں | اختلاف | مکمل طور پر متفق نہیں                                                                                                                                           |
|----------------------|------------|--------------------------------|--------|-----------------------------------------------------------------------------------------------------------------------------------------------------------------|
| 5                    | 4          | 3                              | 2      | 1<br>1 مجھے عام حالات میں گلوٹین سے پاک کھانا مشکل لگتا ہے                                                                                                      |
| 5                    | 4          | 3                              | 2      | 1<br>2. مجھے عام حالات میں گلوٹین سے پاک پکانا مشکل لگتا ہے                                                                                                     |
| 5                    | 4          | 3                              | 2      | 1<br>3. جب میرے پاس بہت کم پیسہ ہوتا ہے تو مجھے گلوٹین سے پاک کھانا مشکل لگتا ہے                                                                                |
| 5                    | 4          | 3                              | 2      | 1<br>4. جب میرے پاس بہت کم پیسہ ہوتا ہے تو مجھے گلوٹین سے پاک کھانا پکانا مشکل لگتا ہے                                                                          |
| 5                    | 4          | 3                              | 2      | 1<br>5. جب میرے پاس بہت کم وقت ہوتا ہے تو مجھے گلوٹین سے پاک کھانا مشکل لگتا ہے                                                                                 |
| 5                    | 4          | 3                              | 2      | 1<br>6. جب میرے پاس تھوڑا سا وقت ہوتا ہے تو مجھے گلوٹین سے پاک کھانا پکانا مشکل لگتا ہے                                                                         |
| 5                    | 4          | 3                              | 2      | 1<br>7. مجھے صحت مند گلوٹین سے پاک غذا کھانا مشکل لگتا ہے                                                                                                       |
| 5                    | 4          | 3                              | 2      | 1<br>8. مجھے صحت مند گلوٹین سے پاک کھانا پکانا مشکل لگتا ہے                                                                                                     |
| 5                    | 4          | 3                              | 2      | 1<br>9. مجھے مختلف گلوٹین سے پاک غذا کھانا مشکل لگتا ہے                                                                                                         |
| 5                    | 4          | 3                              | 2      | 1<br>10. مجھے مختلف گلوٹین سے پاک کھانا پکانا مشکل لگتا ہے                                                                                                      |
| 5                    | 4          | 3                              | 2      | 1<br>11. مجھے مزیدار گلوٹین سے پاک غذا کھانا مشکل لگتا ہے                                                                                                       |
| 5                    | 4          | 3                              | 2      | 1<br>12. مجھے مزیدار گلوٹین سے پاک کھانا پکانا مشکل لگتا ہے                                                                                                     |
| 5                    | 4          | 3                              | 2      | 1<br>13. مجھے قدرتی طور پر گلوٹین سے پاک مصنوعات کے ساتھ گلوٹین سے پاک کھانا مشکل لگتا ہے<br>(مثال کے طور پر گلوٹین سے پاک پاستا یا گلوٹین سے پاک روٹی کے بغیر) |
| 5                    | 4          | 3                              | 2      | 1<br>14. مجھے قدرتی طور پر گلوٹین سے پاک مصنوعات کے ساتھ گلوٹین سے پاک پکانا مشکل لگتا ہے<br>(مثال کے طور پر گلوٹین سے پاک پاستا یا گلوٹین سے پاک روٹی کے بغیر) |
| 5                    | 4          | 3                              | 2      | 1<br>15. مجھے سپر مارکیٹ میں گلوٹین سے پاک مصنوعات کی موجودہ رہنما کے ساتھ گلوٹین سے پاک کھانا مشکل لگتا ہے                                                     |
| 5                    | 4          | 3                              | 2      | 1<br>16. مجھے سپر مارکیٹ میں گلوٹین سے پاک مصنوعات کی موجودہ رہنما کے ساتھ گلوٹین سے پاک کھانا پکانا مشکل لگتا ہے                                               |
| 5                    | 4          | 3                              | 2      | 1<br>17. مجھے ریستورانوں / کیفے میں گلوٹین سے پاک مصنوعات کی موجودہ رہنما کے ساتھ گلوٹین سے پاک کھانا مشکل لگتا ہے                                              |
| 5                    | 4          | 3                              | 2      | 1<br>18. جب میں دوستوں / کہنے والوں کے ساتھ کھانا کھاؤں تو مجھے گلوٹین سے پاک کھانا مشکل لگتا ہے                                                                |



|                                                                                                            |   |   |   |   |   |
|------------------------------------------------------------------------------------------------------------|---|---|---|---|---|
| 19. مجھے گلوٹین سے پاک کھانا مشکل لگتا ہے جب گلوٹین سے پاک مصنوعات فروخت کرنے والی جگہیں بہت دور ہوتی ہیں۔ | 1 | 2 | 3 | 4 | 5 |
|------------------------------------------------------------------------------------------------------------|---|---|---|---|---|

### (Food Security) تحفظ

مندرجہ ذیل بیانات آپ کے گھرانے میں خوراک کے استعمال اور اس بات سے متعلق ہیں کہ آیا آپ کو مطلوبہ (گلوٹن فری) خوراک خریدنے کی استطاعت تھی یا نہیں۔ یہ بیانات گزشتہ ۱۲ ماہ سے متعلق ہیں۔ براہ کرم درج ذیل بیانات کے بارے میں بتائیں کہ یہ آپ پر کتنی بار لاگو ہوتے ہیں۔

گزشتہ ۱۲ ماہ میں، میرے (یاد گیر گھر کے افراد کے) خریدے گئے کھانے ناکافی تھے، اور میرے (یاد گیر گھر کے افراد کے) پاس مزید (گلوٹن فری) خوراک خریدنے کے لیے رقم نہیں تھی۔

یہ اکثر ہوا۔

یہ کبھی کبھار ہوا۔

یہ کبھی نہیں ہوا۔

معلوم نہیں / کہنا نہیں چاہتے۔

گزشتہ ۱۲ ماہ میں، میرے (یاد گیر گھر کے افراد کے) پاس صحت مند (گلوٹن فری) کھانا کھانے کے لیے کافی رقم نہیں تھی۔ ۲

یہ اکثر ہوا۔

یہ کبھی کبھار ہوا۔

یہ کبھی نہیں ہوا۔

معلوم نہیں / کہنا نہیں چاہتے۔

گزشتہ ۱۲ ماہ میں، میں نے (یاد گیر گھر کے افراد نے) کبھی کبھار کھانے کی مقدار کم کی یا کھانا چھوڑ دیا کیونکہ (گلوٹن فری) خوراک خریدنے کے لیے ۳ رقم ناکافی تھی۔

جی ہاں۔

نہیں (۵۔ سوال نمبر ۴ پر جائیں)۔

معلوم نہیں / کہنا نہیں چاہتے (۵۔ سوال نمبر ۴ پر جائیں)۔

گزشتہ ۱۲ ماہ میں یہ کتنی بار ہوا؟ ۴

(تقریباً) ہر مہینے۔

• کچھ مہینوں میں لیکن ہر مہینے نہیں

• صرف ۲ یا ۳ مہینوں میں

• معلوم نہیں / کہنا نہیں چاہتے

- گزشتہ ۱۲ ماہ میں، میں نے (یاد گیر گھر کے افراد نے) کبھی کبھار بہت کم کھایا کیونکہ (گلوٹن فری) خوراک خریدنے کے لیے رقم ناکافی تھی۔ ۵

• جی ہاں

• نہیں

• معلوم نہیں / کہنا نہیں چاہتے

- گزشتہ ۱۲ ماہ میں، میں نے (یاد گیر گھر کے افراد نے) کبھی کبھار بھوک محسوس کی، لیکن کھایا نہیں کیونکہ کھانے کے لیے رقم نہیں تھی۔ ۶

• جی ہاں

• نہیں

• معلوم نہیں / کہنا نہیں چاہتے

مالی معاملات پر آپ کی رائے

مندرجہ ذیل بیانات مالی معاملات کے بارے میں ہیں۔ یہ بیانات گزشتہ ۱۲ ماہ کے بارے میں ہیں۔ مندرجہ ذیل بیانات سے آپ کس حد تک متفق یا متفق

| مکمل | اتفاق کرنا | اتفاق نہ کریں، | اختلاف | مکمل |                                                         |
|------|------------|----------------|--------|------|---------------------------------------------------------|
| 5    | 4          | 3              | 2      | 1    | میرے پاس اکثر بہت کم پیسے ہوتے ہیں۔ 1.                  |
| 5    | 4          | 3              | 2      | 1    | میں ہر وقت سوچتا ہوں کہ کیا میرے پاس کافی پیسہ 2.       |
| 5    | 4          | 3              | 2      | 1    | میں اکثر پیسے کے بارے میں فکر مند ہوں۔ 3.               |
| 5    | 4          | 3              | 2      | 1    | مجھے صرف اس بات کی فکر ہے کہ مجھے اب کیا ادا کرنا 4.    |
| 5    | 4          | 3              | 2      | 1    | مجھے لگتا ہے کہ میرا اپنی مالی حالت پر بہت کم کنٹرول 5. |

براہ کرم درج ذیل پانچ بیانات میں سے ہر ایک کے بارے میں بتائیں کہ پچھلے دو ہفتوں کے دوران آپ کی کیفیت کس کے قریب رہی ہے۔

نوٹ کریں کہ زیادہ نمبر بہتر ذہنی صحت کی علامت ہیں۔

| کبھی نہیں | کچھ وقت | آدھے سے کم وقت | آدھے سے زیادہ وقت | زیادہ تر وقت | ہر وقت | بیانات                                               |
|-----------|---------|----------------|-------------------|--------------|--------|------------------------------------------------------|
| 0         | 1       | 2              | 3                 | 4            | 5      | ۔ میں نے خود کو ا خوش اور اچھے موڈ میں محسوس کیا۔    |
| 0         | 1       | 2              | 3                 | 4            | 5      | ۔ میں نے خود کو ۲ پُر سکون اور مطمئن محسوس کیا۔      |
| 0         | 1       | 2              | 3                 | 4            | 5      | ۔ میں نے خود کو ۳ متحرک اور پرجوش محسوس کیا۔         |
| 0         | 1       | 2              | 3                 | 4            | 5      | ۔ میں جاگنے پر ۴ تازگی اور سکون محسوس کرتا/کرتی ہوں۔ |
| 0         | 1       | 2              | 3                 | 4            | 5      | ۔ میری روزمرہ ۵ زندگی دلچسپ چیزوں سے بھرپور رہی ہے۔  |
