# Supplementary material for: Assessing food insecurity and other barriers to adherence to a gluten-free diet among coeliac disease individuals in Pakistan
Source: Research Square preprint supplement (doi:10.21203/rs.3.rs-8559941/v1), 2026-01-22
Supplement: Supplementary file 2 [file bfa1ff848c69cd99e2d0987c.pdf]

## SPSS output showing variance for each component from factor analysis

### Total Variance Explained

| Component | Total | Initial Eigenvalues |              | Extraction Sums of Squared Loadings |               |              | Rotation Sums of Squared Loadings <sup>a</sup> |
|-----------|-------|---------------------|--------------|-------------------------------------|---------------|--------------|------------------------------------------------|
|           |       | % of Variance       | Cumulative % | Total                               | % of Variance | Cumulative % | Total                                          |
| 1         | 8.616 | 45.349              | 45.349       | 8.616                               | 45.349        | 45.349       | 6.581                                          |
| 2         | 2.304 | 12.127              | 57.476       | 2.304                               | 12.127        | 57.476       | 5.511                                          |
| 3         | 1.268 | 6.675               | 64.151       | 1.268                               | 6.675         | 64.151       | 3.019                                          |
| 4         | 1.001 | 5.267               | 69.418       | 1.001                               | 5.267         | 69.418       | 6.405                                          |
| 5         | .790  | 4.159               | 73.577       |                                     |               |              |                                                |
| 6         | .723  | 3.806               | 77.384       |                                     |               |              |                                                |
| 7         | .598  | 3.145               | 80.529       |                                     |               |              |                                                |
| 8         | .531  | 2.793               | 83.322       |                                     |               |              |                                                |
| 9         | .504  | 2.652               | 85.974       |                                     |               |              |                                                |
| 10        | .499  | 2.627               | 88.602       |                                     |               |              |                                                |
| 11        | .416  | 2.192               | 90.793       |                                     |               |              |                                                |
| 12        | .317  | 1.667               | 92.460       |                                     |               |              |                                                |
| 13        | .269  | 1.418               | 93.878       |                                     |               |              |                                                |
| 14        | .264  | 1.388               | 95.266       |                                     |               |              |                                                |
| 15        | .209  | 1.099               | 96.365       |                                     |               |              |                                                |
| 16        | .198  | 1.044               | 97.410       |                                     |               |              |                                                |
| 17        | .190  | .998                | 98.408       |                                     |               |              |                                                |
| 18        | .161  | .845                | 99.253       |                                     |               |              |                                                |
| 19        | .142  | .747                | 100.000      |                                     |               |              |                                                |

Extraction Method: Principal Component Analysis.

a. When components are correlated, sums of squared loadings cannot be added to obtain a total variance.

## SPSS output for component statements related to GF diet adherence

**Pattern Matrix<sup>a</sup>**

|                                                                                                            | Component |       |      |      |
|------------------------------------------------------------------------------------------------------------|-----------|-------|------|------|
|                                                                                                            | 1         | 2     | 3    | 4    |
| I find it difficult to eat gluten-free foods under normal circumstances                                    |           |       |      | .595 |
| I find it difficult to cook gluten-free foods under normal circumstances                                   |           |       |      | .585 |
| I find it difficult to eat gluten-free when I have little money                                            |           |       |      | .827 |
| I find it difficult to cook gluten-free when I have little money                                           |           |       |      | .824 |
| I find it difficult to eat gluten-free when I have little time                                             |           |       |      | .667 |
| I find it difficult to cook gluten-free when I have little time                                            |           |       |      | .737 |
| I find it difficult to eat a healthy gluten-free diet                                                      | .771      |       |      |      |
| I find it difficult to cook healthy gluten-free meal                                                       | .835      |       |      |      |
| I find it difficult to eat a varied gluten-free diet                                                       | .696      |       |      |      |
| I find it difficult to cook varied gluten-free meals                                                       | .722      |       |      |      |
| I find it difficult to eat a delicious gluten-free diet                                                    | .653      |       |      |      |
| I find it difficult to cook delicious gluten-free meals                                                    | .751      |       |      |      |
| I find it difficult to eat gluten-free with products that are naturally gluten-free                        |           |       | .872 |      |
| I find it difficult to cook gluten-free with products that are naturally gluten-free                       |           |       | .819 |      |
| I find it difficult to eat gluten-free with the current range of gluten-free products in the market        |           | -.742 |      |      |
| I find it difficult to cook gluten-free with the current range of gluten-free products in the supermarket  |           | -.744 |      |      |
| I find it difficult to eat gluten-free with the current range of gluten-free products in restaurants/cafes |           | -.855 |      |      |
| I find it difficult to eat gluten-free when I eat with friends/family/acquaintances                        |           | -.820 |      |      |
| I find it difficult to eat gluten-free when the places that sell gluten-free products are far away         |           | -.780 |      |      |

Extraction Method: Principal Component Analysis.

Rotation Method: Oblimin with Kaiser Normalization.

a. Rotation converged in 10 iterations.
